# Supplementary material for: Immune Checkpoint Blockade for Metastatic Uveal Melanoma: Patterns of Response and Survival According to the Presence of Hepatic and Extrahepatic Metastasis
Source: MDPI journal article supplement (doi:10.3390/cancers13133359), 2021-07-04
Supplement: s1 [file s1]

## Supplementary Materials:

# Immune Checkpoint Blockade for Metastatic Uveal Melanoma: Patterns of Response and Survival According to the Presence of Hepatic and Extrahepatic Metastasis

Elias A. T. Koch, Anne Petzold, Anja Wessely, Edgar Dippel, Anja Gesierich, Ralf Gutzmer, Jessica C. Hassel, Sebastian Haferkamp, Bettina Hohberger, Katharina C. Kähler, Harald Knorr, Nicole Kreuzberg, Ulrike Leiter, Carmen Loquai, Friedegund Meier, Markus Meissner, Peter Mohr, Claudia Pföhler, Farnaz Rahimi, Dirk Schadendorf, Beatrice Schell, Max Schlaak, Patrick Terheyden, Kai-Martin Thoms, Beatrice Schuler-Thurner, Selma Ugurel, Jens Ulrich, Jochen Utikal, Michael Weichenthal, Fabian Ziller, Carola Berking, Markus V. Heppt and on behalf of the German Dermatologic Cooperative Oncology Group (DeCOG, Committee Ocular Melanoma)

Table S1. Baseline characteristics between single PD1 and dual ICB therapy.

| 1.  | 2.                               | 3.  | Single PD1 (N=53) | 4.  | Combi (N=109)    | 5.  | Test             |     |        |
|-----|----------------------------------|-----|-------------------|-----|------------------|-----|------------------|-----|--------|
| 6.  | Sex                              | 7.  | Women             | 8.  | 28 (52.8%)       | 9.  | 54 (49.5%)       | 10. | p=0.82 |
|     |                                  | 11. | Men               | 12. | 25 (47.2%)       | 13. | 55 (50.5%)       |     |        |
| 14. | Age                              | 15. | Median (range)    | 16. | 65.4 (31.4-83.6) | 17. | 65.6 (17.7-87.6) | 18. | p=0.99 |
|     |                                  | 20. | not elevated      | 21. | 11 (20.8%)       | 22. | 30 (27.5%)       |     |        |
| 19. | LDH                              | 24. | Elevated          | 25. | 27 (50.9%)       | 26. | 55 (50.5%)       | 23. | p=0.46 |
|     |                                  | 27. | NA                | 28. | 15 (28.3%)       | 29. | 24 (22.0%)       |     |        |
|     |                                  | 31. | ECOG 0            | 32. | 24 (45.3%)       | 33. | 60 (55.0%)       |     |        |
| 30. | ECOG                             | 35. | ECOG 1            | 36. | 2 (3.8%)         | 37. | 14 (12.8%)       | 34. | p=0.32 |
|     |                                  | 38. | ECOG 2            | 39. | 3 (5.7%)         | 40. | 1 (0.9%)         |     |        |
|     |                                  | 41. | ECOG 3            | 42. | 1 (1.9%)         | 43. | 1 (0.9%)         |     |        |
|     |                                  | 44. | ECOG 4            | 45. | 0 (0.0%)         | 46. | 0 (0.0%)         |     |        |
|     |                                  | 47. | ECOG 5            | 48. | 0 (0.0%)         | 49. | 0 (0.0%)         |     |        |
| 50. | NA                               | 51. | 23 (43.4%)        | 52. | 33 (30.3%)       |     |                  |     |        |
| 53. | Number of affected organ systems | 54. | Median (range)    | 55. | 2 (1-7)          | 56. | 2 (1-6)          | 57. | p=0.34 |
| 58. | Affected organ systems           | 59. | Liver             | 60. | 53 (100%)        | 61. | 109 (100%)       | 62. | p=0.44 |
|     |                                  | 63. | Pulmonary         | 64. | 26 (49.1%)       | 65. | 45 (41.3%)       |     |        |

|     |                           |                        |                   |            |         |               |         |        |         |
|-----|---------------------------|------------------------|-------------------|------------|---------|---------------|---------|--------|---------|
|     | 66.                       | Bone                   | 67.               | 13 (24.5%) | 68.     | 26<br>(23.9%) |         |        |         |
|     | 69.                       | CNS                    | 70.               | 7 (13.2%)  | 71.     | 12<br>(11.0%) |         |        |         |
|     | 72.                       | Lymph<br>node          | 73.               | 16 (30.2%) | 74.     | 17<br>(15.6%) |         |        |         |
|     | 75.                       | Connec-<br>tive tissue | 76.               | 4 (7.5%)   | 77.     | 4<br>(3.7%)   |         |        |         |
|     | 78.                       | Skin                   | 79.               | 12 (22.6%) | 80.     | 8<br>(7.3%)   |         |        |         |
|     | 81.                       | Dissemi-<br>nated      | 82.               | 3 (7.5%)   | 83.     | 5<br>(4.6%)   |         |        |         |
|     | 84.                       | Other                  | 85.               | 16 (30.2%) | 86.     | 27<br>(24.8%) |         |        |         |
|     | 87.                       | NA                     | 88.               | 0 (0.0%)   | 89.     | 0<br>(0.0%)   |         |        |         |
| 90. | CPI as first-line therapy | 91.                    | 92.               | 42 (79.2%) | 93.     | 97<br>(89.0%) | 94.     | p=0.15 |         |
| 95. | Number of pre-therapies   | 96.                    | Median<br>(range) | 97.        | 0 (0-3) | 98.           | 0 (0-1) | 99.    | p=0.064 |
